# Supplementary material for: The CBL-CIPK Network Integrates Calcium and ABA Signaling to Mediate Drought Adaptation in Asparagus cochinchinensis
Source: Research Square preprint supplement (doi:10.21203/rs.3.rs-8784662/v1), 2026-02-14
Supplement: Supplementary file 1 [file dd207d3518c34cd4e5eebabd.docx]

| **Name** | **Sequence (5' -- 3')** | **Function** |
| --- | --- | --- |
| AcCIPK2.1-qF | TTGATTAGTGCGGTTGATTATCGC | qRT-PCR detection |
| AcCIPK2.1-qR | CAAGTGGTGTGAAGTAAACCATCT |
| AcCIPK9.3-qF | AGGGTGGGTAAGTACGAGCT |
| AcCIPK9.3-qR | ATATGTTCGACCATTTTGTGCTTG |
| AcCIPK10.3-qF | ATGGGAACAGATATGAAAGGGAGT |
| AcCIPK10.3-qR | GACCTTCTCTTTGTCAATTACCTTT |
| AcCIPK10.4-qF | CCAGCTACCACAATTATCTCAAGG |
| AcCIPK10.4-qR | GAGTCATCTCAAAGATCTCTGCAT |
| AcCIPK10.8-qF | GGAGATTGCCAAGAGACTGAGAT |
| AcCIPK10.8-qR | ATCTCGACCAAATGAAACGAGGG |
| AcCIPK24.5-qF | CGATTTCGGTGCGGGAGATGA |
| AcCIPK24.5-qR | GATGGTGGACTTATCGAGGACT |
| AcCBL10-qF | GGAAGAGTTGCAATTGGCATTGTTT |
| AcCBL10-qR | TTGCTCCTGTAGAGGACAAAATTG |
| BnaACT2-qF | GATGGTGGGCATGGGTCAGAAGGA |
| BnaACT2-qF | CATTGTAGAAGGTGTGGTGCCAGAT |
| AcCIPK24-BD-F | atggccatggaggccgaattcATGAAGAAGGTGGGCAAGTACG | Construction of yeast two hybrid vector |
| AcCIPK24-BD-R | atgcggccgctgcaggtcgacTCAGCAAGTTGTCGTCCTCATC |
| AcCBL10-AD-F | gccatggaggccagtgaattcATGCCTTCAAGCGAAATCGTA |
| AcCBL10-AD-R | acgattcatctgcagctcgagTTAATCCTCAACCTCAGTGTTGAAGA |

**Table S1 List of Primers used for qRT-PCR**
